# Supplementary material for: Inverse Regulation of Cartilage Neogenesis at Physiologically Relevant Calcium Conditions by Human Articular Chondrocytes and Mesenchymal Stromal Cells
Source: MDPI journal article supplement (doi:10.3390/cells12121659), 2023-06-18
Supplement: s1 [file s1]

**Supplementary table S2** PTHrP protein concentration [pmol/L] in day 35 neocartilage from AC and BMSC-derived chondrocytes

| [Ca <sup>2+</sup> ] <sub>e</sub> | AC       |          |          | BMSC     |
|----------------------------------|----------|----------|----------|----------|
|                                  | Donor #1 | Donor #2 | Donor #3 | Donor #1 |
| 1.8 mM                           | <0.50    | <0.50    | <0.50    | <0.50    |
| 8.0 mM                           | 5,4      | 2,5      | <0.50    | <0.50    |
