# Supplementary material for: Inverse Regulation of Cartilage Neogenesis at Physiologically Relevant Calcium Conditions by Human Articular Chondrocytes and Mesenchymal Stromal Cells
Source: MDPI journal article supplement (doi:10.3390/cells12121659), 2023-06-18
Supplement: s1 [file s1]

**Supplementary table S1 List of qRT-PCR primers used in this study**

| <b>Gene</b>    | <b>Fw primer 5' to 3'</b> | <b>Rw primer 5' to 3'</b> |
|----------------|---------------------------|---------------------------|
| <i>18S</i>     | GTAACCCGTTGAACCCATT       | CCATCCAATCGGTAGTAGCG      |
| <i>GAPDH</i>   | CCACCCATGGCAAATTCATGGCA   | TCTAGACGGCAGGTCAGGTCCACC  |
| <i>RPL13</i>   | CATTTCTGGCAATTTCTACAG     | CAGGCAACGCATGAGGAAT       |
| <i>COL2A1</i>  | TGGCCTGAGACAGCATGAC       | AGTGTTGGGAGCCAGATTGT      |
| <i>ACAN</i>    | GCACATGCCTTCTGCTT         | GGAACCACTTGGGTCACG        |
| <i>SOX9</i>    | GTACCCGCACTTGCACAAC       | TCGCTCTCGTTCAGAAGTCTC     |
| <i>COL10A1</i> | TTTACGCTGAACGATACCAAA     | TTGCTCTCCTCTTACTGCTAT     |
| <i>IBSP</i>    | CAGGGCAGTAGTGACTCATCC     | TCGATTCTTCATTGTTTTCTCCT   |
| <i>MEF2C</i>   | GTATGGCAATCCCCGAACT       | ATCGTATTCTTGCTGCCTGG      |
| <i>BMP2</i>    | ACGAGGTCCTGAGCGAGTTC      | GAAGCTCTGCTGAGGTGATAA     |
| <i>BMP4</i>    | GGATCTTTACCGGCTTCAGTC     | CCTGGGATGTTCTCCAGATG      |
| <i>BMP6</i>    | ATTACAACAGCAGTGAATTGA     | TTCATGTGTGCGTTGAGTG       |
| <i>ID1</i>     | ATCAGGGACCTTCAGTTGGAGC    | AGACCCACAGAGCACGTAATTCC   |
| <i>GREM1</i>   | CCGCACTCAGCGCCAC          | AGGGCTCCCACCGTGTA         |
| <i>PTH1H</i>   | CGGTGTTCTGCTGAGCTA        | TGCGATCAGATGGTGAAGGA      |
